# Supplementary material for: Autumn–winter minimum temperature changes in the southern Sikhote-Alin mountain range of northeastern Asia since 1529 AD
Source: Copernicus journal article supplement (doi:10.5194/cp-14-57-2018), 2018-01-16
Supplement: Supplementary file 1 [file cp-14-57-2018-supplement.zip]

Archive with 2 entries (2 files):
- Ukhvatkina_et_al_VUSr.xlsx
- cp-14-57-2018-supplement-title-page.pdf
