# Supplementary material for: Autumn–winter minimum temperature changes in the southern Sikhote-Alin mountain range of northeastern Asia since 1529 AD
Source: Copernicus journal article supplement (doi:10.5194/cp-14-57-2018), 2018-01-16
Supplement: Supplementary file 1 [file cp-14-57-2018-supplement.zip › cp-14-57-2018-supplement-title-page.pdf]

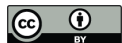

## *Supplement of*

# **Autumn–winter minimum temperature changes in the southern Sikhote-Alin mountain range of northeastern Asia since 1529 AD**

**Olga N. Ukhvatkina et al.**

*Correspondence to:* Olga N. Ukhvatkina ([ukhvatkina@gmail.com](mailto:ukhvatkina@gmail.com))

- [cp-14-57-2018-supplement-title-page.pdf](#)
- [Ukhvatkina\\_et\\_al\\_VUSr.xlsx](#)

The copyright of individual parts of the supplement might differ from the CC BY 4.0 License.
