# Supplementary material for: Autumn–winter minimum temperature changes in the southern Sikhote-Alin mountain range of northeastern Asia since 1529 AD
Source: Copernicus journal article supplement (doi:10.5194/cp-14-57-2018), 2018-01-16
Supplement: Supplementary file 1 [file Ukhvatkina_et_al_VUSr.xlsx]

## Sheet: Лист3
Year	Trec_-8-12	Mean+0.5	Mean-0.5	Mean	smoth21
1451	-7.71116	-7.23236	-8.62934	-7.93085	0
1452	-7.21505	-7.23236	-8.62934	-7.93085	0
1453	-6.532	-7.23236	-8.62934	-7.93085	0
1454	-7.60331	-7.23236	-8.62934	-7.93085	0
1455	-7.4667	-7.23236	-8.62934	-7.93085	0
1456	-8.24322	-7.23236	-8.62934	-7.93085	0
1457	-8.12099	-7.23236	-8.62934	-7.93085	0
1458	-4.7345	-7.23236	-8.62934	-7.93085	0
1459	-8.46611	-7.23236	-8.62934	-7.93085	0
1460	-8.7609	-7.23236	-8.62934	-7.93085	-8.12955
1461	-7.3229	-7.23236	-8.62934	-7.93085	-8.22165
1462	-8.72495	-7.23236	-8.62934	-7.93085	-8.26034
1463	-8.86875	-7.23236	-8.62934	-7.93085	-8.35655
1464	-7.83339	-7.23236	-8.62934	-7.93085	-8.34628
1465	-8.73214	-7.23236	-8.62934	-7.93085	-8.35552
1466	-8.07066	-7.23236	-8.62934	-7.93085	-8.33429
1467	-7.84777	-7.23236	-8.62934	-7.93085	-8.26171
1468	-9.68122	-7.23236	-8.62934	-7.93085	-8.36956
1469	-9.99039	-7.23236	-8.62934	-7.93085	-8.39181
1470	-9.3361	-7.23236	-8.62934	-7.93085	-8.37059
1471	-9.45833	-7.23236	-8.62934	-7.93085	-8.35826
1472	-9.64527	-7.23236	-8.62934	-7.93085	-8.23843
1473	-8.02752	-7.23236	-8.62934	-7.93085	-8.16071
1474	-8.55239	-7.23236	-8.62934	-7.93085	-8.09805
1475	-7.38761	-7.23236	-8.62934	-7.93085	-7.99705
1476	-7.66083	-7.23236	-8.62934	-7.93085	-7.96418
1477	-7.79744	-7.23236	-8.62934	-7.93085	-7.92275
1478	-6.59671	-7.23236	-8.62934	-7.93085	-7.71082
1479	-6.99935	-7.23236	-8.62934	-7.93085	-7.56736
1480	-8.93346	-7.23236	-8.62934	-7.93085	-7.59509
1481	-8.31512	-7.23236	-8.62934	-7.93085	-7.58619
1482	-7.06406	-7.23236	-8.62934	-7.93085	-7.53826
1483	-6.20845	-7.23236	-8.62934	-7.93085	-7.5968
1484	-7.23662	-7.23236	-8.62934	-7.93085	-7.6598
1485	-6.51762	-7.23236	-8.62934	-7.93085	-7.77347
1486	-6.61109	-7.23236	-8.62934	-7.93085	-7.85838
1487	-7.38042	-7.23236	-8.62934	-7.93085	-7.91522
1488	-6.97778	-7.23236	-8.62934	-7.93085	-7.9878
1489	-5.23061	-7.23236	-8.62934	-7.93085	-7.806
1490	-6.97778	-7.23236	-8.62934	-7.93085	-7.68617
1491	-9.91849	-7.23236	-8.62934	-7.93085	-7.69062
1492	-9.27139	-7.23236	-8.62934	-7.93085	-7.75772
1493	-8.63867	-7.23236	-8.62934	-7.93085	-7.85188
1494	-9.25701	-7.23236	-8.62934	-7.93085	-7.9094
1495	-9.87535	-7.23236	-8.62934	-7.93085	-7.99123
1496	-9.77469	-7.23236	-8.62934	-7.93085	-8.01348
1497	-9.44395	-7.23236	-8.62934	-7.93085	-7.95459
1498	-8.99098	-7.23236	-8.62934	-7.93085	-7.93165
1499	-8.12099	-7.23236	-8.62934	-7.93085	-7.98609
1500	-3.18146	-7.23236	-8.62934	-7.93085	-7.95767
1501	-6.41696	-7.23236	-8.62934	-7.93085	-7.88783
1502	-8.40859	-7.23236	-8.62934	-7.93085	-7.8803
1503	-8.4733	-7.23236	-8.62934	-7.93085	-7.80737
1504	-8.1857	-7.23236	-8.62934	-7.93085	-7.68754
1505	-8.44454	-7.23236	-8.62934	-7.93085	-7.6444
1506	-8.23603	-7.23236	-8.62934	-7.93085	-7.52696
1507	-7.07844	-7.23236	-8.62934	-7.93085	-7.31263
1508	-6.14374	-7.23236	-8.62934	-7.93085	-7.20101
1509	-6.49605	-7.23236	-8.62934	-7.93085	-7.13562
1510	-6.37382	-7.23236	-8.62934	-7.93085	-7.32906
1511	-6.38101	-7.23236	-8.62934	-7.93085	-7.42835
1512	-8.45173	-7.23236	-8.62934	-7.93085	-7.34379
1513	-9.11321	-7.23236	-8.62934	-7.93085	-7.2397
1514	-7.1072	-7.23236	-8.62934	-7.93085	-7.09933
1515	-6.74051	-7.23236	-8.62934	-7.93085	-7.08152
1516	-8.96941	-7.23236	-8.62934	-7.93085	-7.00962
1517	-7.30852	-7.23236	-8.62934	-7.93085	-6.94423
1518	-4.94301	-7.23236	-8.62934	-7.93085	-6.95039
1519	-6.64704	-7.23236	-8.62934	-7.93085	-7.0014
1520	-6.7477	-7.23236	-8.62934	-7.93085	-7.12192
1521	-7.24381	-7.23236	-8.62934	-7.93085	-7.14657
1522	-8.50206	-7.23236	-8.62934	-7.93085	-7.21026
1523	-6.63266	-7.23236	-8.62934	-7.93085	-7.13322
1524	-6.28754	-7.23236	-8.62934	-7.93085	-7.15993
1525	-5.2378	-7.23236	-8.62934	-7.93085	-7.18184
1526	-8.07066	-7.23236	-8.62934	-7.93085	-7.05687
1527	-6.72613	-7.23236	-8.62934	-7.93085	-7.05036
1528	-5.70515	-7.23236	-8.62934	-7.93085	-7.23833
1529	-6.27316	-7.23236	-8.62934	-7.93085	-7.36844
1530	-7.56736	-7.23236	-8.62934	-7.93085	-7.46293
1531	-8.9047	-7.23236	-8.62934	-7.93085	-7.52627
1532	-6.89869	-7.23236	-8.62934	-7.93085	-7.5903
1533	-9.78907	-7.23236	-8.62934	-7.93085	-7.67589
1534	-7.49546	-7.23236	-8.62934	-7.93085	-7.77861
1535	-7.66802	-7.23236	-8.62934	-7.93085	-7.92446
1536	-7.20067	-7.23236	-8.62934	-7.93085	-7.90324
1537	-6.34506	-7.23236	-8.62934	-7.93085	-7.92001
1538	-7.17191	-7.23236	-8.62934	-7.93085	-8.10353
1539	-8.89032	-7.23236	-8.62934	-7.93085	-8.26034
1540	-9.37924	-7.23236	-8.62934	-7.93085	-8.37059
1541	-8.73214	-7.23236	-8.62934	-7.93085	-8.31991
1542	-8.57396	-7.23236	-8.62934	-7.93085	-8.43667
1543	-9.84659	-7.23236	-8.62934	-7.93085	-8.4151
1544	-8.43016	-7.23236	-8.62934	-7.93085	-8.44796
1545	-8.44454	-7.23236	-8.62934	-7.93085	-8.47296
1546	-8.30074	-7.23236	-8.62934	-7.93085	-8.51404
1547	-7.62488	-7.23236	-8.62934	-7.93085	-8.59142
1548	-7.07844	-7.23236	-8.62934	-7.93085	-8.62429
1549	-9.55899	-7.23236	-8.62934	-7.93085	-8.61094
1550	-9.56618	-7.23236	-8.62934	-7.93085	-8.50788
1551	-9.88254	-7.23236	-8.62934	-7.93085	-8.32847
1552	-7.84058	-7.23236	-8.62934	-7.93085	-8.26137
1553	-9.35048	-7.23236	-8.62934	-7.93085	-8.00081
1554	-9.3361	-7.23236	-8.62934	-7.93085	-7.87893
1555	-8.1857	-7.23236	-8.62934	-7.93085	-7.74848
1556	-8.19289	-7.23236	-8.62934	-7.93085	-7.6961
1557	-8.06347	-7.23236	-8.62934	-7.93085	-7.642
1558	-7.97	-7.23236	-8.62934	-7.93085	-7.68103
1559	-7.86215	-7.23236	-8.62934	-7.93085	-7.58482
1560	-8.60991	-7.23236	-8.62934	-7.93085	-7.47492
1561	-7.21505	-7.23236	-8.62934	-7.93085	-7.27462
1562	-4.96458	-7.23236	-8.62934	-7.93085	-7.18458
1563	-7.16472	-7.23236	-8.62934	-7.93085	-6.94628
1564	-4.375	-7.23236	-8.62934	-7.93085	-6.8511
1565	-5.87052	-7.23236	-8.62934	-7.93085	-6.86274
1566	-5.70515	-7.23236	-8.62934	-7.93085	-6.82576
1567	-7.20067	-7.23236	-8.62934	-7.93085	-6.77269
1568	-6.48886	-7.23236	-8.62934	-7.93085	-6.80454
1569	-7.8981	-7.23236	-8.62934	-7.93085	-6.6984
1570	-7.5386	-7.23236	-8.62934	-7.93085	-6.56008
1571	-7.25819	-7.23236	-8.62934	-7.93085	-6.48886
1572	-5.67639	-7.23236	-8.62934	-7.93085	-6.61794
1573	-5.94961	-7.23236	-8.62934	-7.93085	-6.58199
1574	-4.34624	-7.23236	-8.62934	-7.93085	-6.76003
1575	-7.33728	-7.23236	-8.62934	-7.93085	-6.85007
1576	-8.43016	-7.23236	-8.62934	-7.93085	-6.93909
1577	-7.41637	-7.23236	-8.62934	-7.93085	-7.00175
1578	-6.94902	-7.23236	-8.62934	-7.93085	-7.07262
1579	-8.63867	-7.23236	-8.62934	-7.93085	-7.05995
1580	-5.63325	-7.23236	-8.62934	-7.93085	-7.09898
1581	-5.70515	-7.23236	-8.62934	-7.93085	-7.14383
1582	-5.71953	-7.23236	-8.62934	-7.93085	-7.27908
1583	-7.67521	-7.23236	-8.62934	-7.93085	-7.40678
1584	-6.40977	-7.23236	-8.62934	-7.93085	-7.65638
1585	-8.1138	-7.23236	-8.62934	-7.93085	-7.65638
1586	-7.76149	-7.23236	-8.62934	-7.93085	-7.67863
1587	-7.57455	-7.23236	-8.62934	-7.93085	-7.67007
1588	-8.51644	-7.23236	-8.62934	-7.93085	-7.75738
1589	-7.97719	-7.23236	-8.62934	-7.93085	-7.75019
1590	-7.63207	-7.23236	-8.62934	-7.93085	-7.88235
1591	-8.35826	-7.23236	-8.62934	-7.93085	-7.96486
1592	-8.20008	-7.23236	-8.62934	-7.93085	-8.09086
1593	-8.51644	-7.23236	-8.62934	-7.93085	-8.00013
1594	-8.63148	-7.23236	-8.62934	-7.93085	-8.10079
1595	-9.58775	-7.23236	-8.62934	-7.93085	-7.96932
1596	-7.33728	-7.23236	-8.62934	-7.93085	-7.86147
1597	-8.89751	-7.23236	-8.62934	-7.93085	-7.91453
1598	-7.23662	-7.23236	-8.62934	-7.93085	-7.88577
1599	-8.78247	-7.23236	-8.62934	-7.93085	-7.88269
1600	-8.48768	-7.23236	-8.62934	-7.93085	-7.92857
1601	-8.40859	-7.23236	-8.62934	-7.93085	-7.95048
1602	-7.43794	-7.23236	-8.62934	-7.93085	-7.95151
1603	-8.36545	-7.23236	-8.62934	-7.93085	-7.869
1604	-5.76986	-7.23236	-8.62934	-7.93085	-7.72999
1605	-8.52363	-7.23236	-8.62934	-7.93085	-7.56633
1606	-5.35284	-7.23236	-8.62934	-7.93085	-7.6509
1607	-5.49664	-7.23236	-8.62934	-7.93085	-7.55709
1608	-8.689	-7.23236	-8.62934	-7.93085	-7.64679
1609	-7.91248	-7.23236	-8.62934	-7.93085	-7.65056
1610	-7.91248	-7.23236	-8.62934	-7.93085	-7.61974
1611	-8.59553	-7.23236	-8.62934	-7.93085	-7.58585
1612	-8.81842	-7.23236	-8.62934	-7.93085	-7.65706
1613	-8.22165	-7.23236	-8.62934	-7.93085	-7.62248
1614	-6.78365	-7.23236	-8.62934	-7.93085	-7.72828
1615	-5.71234	-7.23236	-8.62934	-7.93085	-7.70534
1616	-6.15093	-7.23236	-8.62934	-7.93085	-7.75635
1617	-9.11321	-7.23236	-8.62934	-7.93085	-7.85941
1618	-6.92745	-7.23236	-8.62934	-7.93085	-7.73513
1619	-9.1204	-7.23236	-8.62934	-7.93085	-7.69678
1620	-8.86156	-7.23236	-8.62934	-7.93085	-7.7567
1621	-7.84058	-7.23236	-8.62934	-7.93085	-7.7341
1622	-7.69678	-7.23236	-8.62934	-7.93085	-7.71184
1623	-8.93346	-7.23236	-8.62934	-7.93085	-7.7567
1624	-7.63926	-7.23236	-8.62934	-7.93085	-7.869
1625	-7.99157	-7.23236	-8.62934	-7.93085	-7.95459
1626	-8.0419	-7.23236	-8.62934	-7.93085	-8.02238
1627	-6.42415	-7.23236	-8.62934	-7.93085	-7.98849
1628	-7.66083	-7.23236	-8.62934	-7.93085	-7.94877
1629	-6.07903	-7.23236	-8.62934	-7.93085	-7.87413
1630	-7.1072	-7.23236	-8.62934	-7.93085	-7.806
1631	-9.17073	-7.23236	-8.62934	-7.93085	-7.81593
1632	-8.12099	-7.23236	-8.62934	-7.93085	-7.86283
1633	-8.35107	-7.23236	-8.62934	-7.93085	-7.80805
1634	-9.16354	-7.23236	-8.62934	-7.93085	-7.88064
1635	-9.14197	-7.23236	-8.62934	-7.93085	-7.95254
1636	-7.50984	-7.23236	-8.62934	-7.93085	-8.08264
1637	-7.57455	-7.23236	-8.62934	-7.93085	-8.23192
1638	-8.4014	-7.23236	-8.62934	-7.93085	-8.32745
1639	-6.09341	-7.23236	-8.62934	-7.93085	-8.44454
1640	-7.55298	-7.23236	-8.62934	-7.93085	-8.50685
1641	-7.43075	-7.23236	-8.62934	-7.93085	-8.49179
1642	-8.04909	-7.23236	-8.62934	-7.93085	-8.48391
1643	-8.68181	-7.23236	-8.62934	-7.93085	-8.4644
1644	-7.78306	-7.23236	-8.62934	-7.93085	-8.39626
1645	-9.16354	-7.23236	-8.62934	-7.93085	-8.32094
1646	-9.50147	-7.23236	-8.62934	-7.93085	-8.39113
1647	-10.7741	-7.23236	-8.62934	-7.93085	-8.40482
1648	-9.55899	-7.23236	-8.62934	-7.93085	-8.44865
1649	-9.66684	-7.23236	-8.62934	-7.93085	-8.59827
1650	-8.53801	-7.23236	-8.62934	-7.93085	-8.6688
1651	-8.41578	-7.23236	-8.62934	-7.93085	-8.84341
1652	-8.85437	-7.23236	-8.62934	-7.93085	-8.89717
1653	-7.95562	-7.23236	-8.62934	-7.93085	-8.93551
1654	-7.94124	-7.23236	-8.62934	-7.93085	-9.01187
1655	-7.73273	-7.23236	-8.62934	-7.93085	-9.01906
1656	-7.56017	-7.23236	-8.62934	-7.93085	-8.98174
1657	-8.98379	-7.23236	-8.62934	-7.93085	-8.87183
1658	-7.86215	-7.23236	-8.62934	-7.93085	-8.83383
1659	-9.32172	-7.23236	-8.62934	-7.93085	-8.73009
1660	-9.23544	-7.23236	-8.62934	-7.93085	-8.69961
1661	-9.03412	-7.23236	-8.62934	-7.93085	-8.70201
1662	-11.0977	-7.23236	-8.62934	-7.93085	-8.65716
1663	-9.17792	-7.23236	-8.62934	-7.93085	-8.66229
1664	-9.48709	-7.23236	-8.62934	-7.93085	-8.72735
1665	-9.38643	-7.23236	-8.62934	-7.93085	-8.72666
1666	-9.31453	-7.23236	-8.62934	-7.93085	-8.81431
1667	-8.71776	-7.23236	-8.62934	-7.93085	-8.81431
1668	-8.46611	-7.23236	-8.62934	-7.93085	-8.84581
1669	-8.7609	-7.23236	-8.62934	-7.93085	-8.77494
1670	-7.48827	-7.23236	-8.62934	-7.93085	-8.75645
1671	-7.8981	-7.23236	-8.62934	-7.93085	-8.72358
1672	-8.46611	-7.23236	-8.62934	-7.93085	-8.63525
1673	-7.91248	-7.23236	-8.62934	-7.93085	-8.62155
1674	-8.06347	-7.23236	-8.62934	-7.93085	-8.61984
1675	-9.30734	-7.23236	-8.62934	-7.93085	-8.60717
1676	-7.71835	-7.23236	-8.62934	-7.93085	-8.56506
1677	-9.40081	-7.23236	-8.62934	-7.93085	-8.54588
1678	-8.98379	-7.23236	-8.62934	-7.93085	-8.56574
1679	-8.52363	-7.23236	-8.62934	-7.93085	-8.54178
1680	-7.83339	-7.23236	-8.62934	-7.93085	-8.55444
1681	-8.84718	-7.23236	-8.62934	-7.93085	-8.52431
1682	-8.34388	-7.23236	-8.62934	-7.93085	-8.49076
1683	-9.24263	-7.23236	-8.62934	-7.93085	-8.49521
1684	-8.89032	-7.23236	-8.62934	-7.93085	-8.48152
1685	-9.45114	-7.23236	-8.62934	-7.93085	-8.37435
1686	-9.1204	-7.23236	-8.62934	-7.93085	-8.39763
1687	-8.43016	-7.23236	-8.62934	-7.93085	-8.33224
1688	-8.31512	-7.23236	-8.62934	-7.93085	-8.33703
1689	-8.88313	-7.23236	-8.62934	-7.93085	-8.30793
1690	-8.2576	-7.23236	-8.62934	-7.93085	-8.31512
1691	-7.7543	-7.23236	-8.62934	-7.93085	-8.22679
1692	-7.26538	-7.23236	-8.62934	-7.93085	-8.16721
1693	-7.76149	-7.23236	-8.62934	-7.93085	-8.13126
1694	-8.00595	-7.23236	-8.62934	-7.93085	-8.14975
1695	-7.77587	-7.23236	-8.62934	-7.93085	-8.11654
1696	-7.05687	-7.23236	-8.62934	-7.93085	-8.06073
1697	-8.20727	-7.23236	-8.62934	-7.93085	-8.12476
1698	-8.02752	-7.23236	-8.62934	-7.93085	-8.21617
1699	-9.08445	-7.23236	-8.62934	-7.93085	-8.22644
1700	-7.91248	-7.23236	-8.62934	-7.93085	-8.21206
1701	-7.98438	-7.23236	-8.62934	-7.93085	-8.26411
1702	-6.99216	-7.23236	-8.62934	-7.93085	-8.28362
1703	-7.09282	-7.23236	-8.62934	-7.93085	-8.2754
1704	-8.48768	-7.23236	-8.62934	-7.93085	-8.26582
1705	-9.27858	-7.23236	-8.62934	-7.93085	-8.30553
1706	-8.75371	-7.23236	-8.62934	-7.93085	-8.33053
1707	-7.94843	-7.23236	-8.62934	-7.93085	-8.30142
1708	-9.77469	-7.23236	-8.62934	-7.93085	-8.29732
1709	-10.2348	-7.23236	-8.62934	-7.93085	-8.2576
1710	-9.09883	-7.23236	-8.62934	-7.93085	-8.26719
1711	-7.95562	-7.23236	-8.62934	-7.93085	-8.33601
1712	-8.84718	-7.23236	-8.62934	-7.93085	-8.41886
1713	-7.67521	-7.23236	-8.62934	-7.93085	-8.47809
1714	-7.58893	-7.23236	-8.62934	-7.93085	-8.49829
1715	-7.80463	-7.23236	-8.62934	-7.93085	-8.47296
1716	-8.60991	-7.23236	-8.62934	-7.93085	-8.48597
1717	-7.58174	-7.23236	-8.62934	-7.93085	-8.58766
1718	-7.59612	-7.23236	-8.62934	-7.93085	-8.59519
1719	-7.94124	-7.23236	-8.62934	-7.93085	-8.57944
1720	-8.25041	-7.23236	-8.62934	-7.93085	-8.57328
1721	-8.1138	-7.23236	-8.62934	-7.93085	-8.59621
1722	-9.42957	-7.23236	-8.62934	-7.93085	-8.59587
1723	-8.73214	-7.23236	-8.62934	-7.93085	-8.62326
1724	-8.33669	-7.23236	-8.62934	-7.93085	-8.68558
1725	-8.91189	-7.23236	-8.62934	-7.93085	-8.65305
1726	-8.74652	-7.23236	-8.62934	-7.93085	-8.62121
1727	-9.02693	-7.23236	-8.62934	-7.93085	-8.53698
1728	-10.0839	-7.23236	-8.62934	-7.93085	-8.43735
1729	-9.93287	-7.23236	-8.62934	-7.93085	-8.31889
1730	-9.90411	-7.23236	-8.62934	-7.93085	-8.18125
1731	-8.96941	-7.23236	-8.62934	-7.93085	-8.14393
1732	-8.43735	-7.23236	-8.62934	-7.93085	-8.02512
1733	-8.83999	-7.23236	-8.62934	-7.93085	-8.00424
1734	-8.25041	-7.23236	-8.62934	-7.93085	-7.98575
1735	-8.89751	-7.23236	-8.62934	-7.93085	-7.93473
1736	-7.12158	-7.23236	-8.62934	-7.93085	-7.93884
1737	-7.94124	-7.23236	-8.62934	-7.93085	-7.95083
1738	-5.813	-7.23236	-8.62934	-7.93085	-7.85393
1739	-5.50383	-7.23236	-8.62934	-7.93085	-7.73615
1740	-5.4535	-7.23236	-8.62934	-7.93085	-7.60434
1741	-5.36003	-7.23236	-8.62934	-7.93085	-7.5475
1742	-7.33009	-7.23236	-8.62934	-7.93085	-7.49683
1743	-6.93464	-7.23236	-8.62934	-7.93085	-7.44616
1744	-8.29355	-7.23236	-8.62934	-7.93085	-7.43212
1745	-7.94843	-7.23236	-8.62934	-7.93085	-7.3318
1746	-7.84058	-7.23236	-8.62934	-7.93085	-7.28592
1747	-8.8328	-7.23236	-8.62934	-7.93085	-7.23114
1748	-9.27858	-7.23236	-8.62934	-7.93085	-7.39754
1749	-8.04909	-7.23236	-8.62934	-7.93085	-7.49888
1750	-7.45951	-7.23236	-8.62934	-7.93085	-7.63241
1751	-7.13596	-7.23236	-8.62934	-7.93085	-7.77519
1752	-7.77587	-7.23236	-8.62934	-7.93085	-7.80189
1753	-7.37323	-7.23236	-8.62934	-7.93085	-7.87311
1754	-7.77587	-7.23236	-8.62934	-7.93085	-7.8286
1755	-7.95562	-7.23236	-8.62934	-7.93085	-7.78785
1756	-6.79084	-7.23236	-8.62934	-7.93085	-7.82791
1757	-6.15812	-7.23236	-8.62934	-7.93085	-7.7769
1758	-6.79084	-7.23236	-8.62934	-7.93085	-7.69849
1759	-9.30734	-7.23236	-8.62934	-7.93085	-7.66015
1760	-7.63207	-7.23236	-8.62934	-7.93085	-7.67418
1761	-8.2576	-7.23236	-8.62934	-7.93085	-7.68308
1762	-8.35826	-7.23236	-8.62934	-7.93085	-7.72314
1763	-7.89091	-7.23236	-8.62934	-7.93085	-7.74882
1764	-8.43016	-7.23236	-8.62934	-7.93085	-7.73136
1765	-7.35885	-7.23236	-8.62934	-7.93085	-7.6848
1766	-7.09282	-7.23236	-8.62934	-7.93085	-7.66391
1767	-8.68181	-7.23236	-8.62934	-7.93085	-7.64371
1768	-7.76149	-7.23236	-8.62934	-7.93085	-7.56839
1769	-7.63207	-7.23236	-8.62934	-7.93085	-7.52867
1770	-7.24381	-7.23236	-8.62934	-7.93085	-7.49135
1771	-7.7543	-7.23236	-8.62934	-7.93085	-7.46088
1772	-7.3229	-7.23236	-8.62934	-7.93085	-7.49888
1773	-8.6171	-7.23236	-8.62934	-7.93085	-7.52114
1774	-7.91248	-7.23236	-8.62934	-7.93085	-7.49957
1775	-7.40918	-7.23236	-8.62934	-7.93085	-7.51874
1776	-6.97778	-7.23236	-8.62934	-7.93085	-7.55983
1777	-6.35225	-7.23236	-8.62934	-7.93085	-7.51361
1778	-5.73391	-7.23236	-8.62934	-7.93085	-7.5475
1779	-5.20904	-7.23236	-8.62934	-7.93085	-7.56222
1780	-8.4733	-7.23236	-8.62934	-7.93085	-7.66254
1781	-6.84836	-7.23236	-8.62934	-7.93085	-7.67589
1782	-7.61769	-7.23236	-8.62934	-7.93085	-7.68582
1783	-9.15635	-7.23236	-8.62934	-7.93085	-7.69781
1784	-8.35826	-7.23236	-8.62934	-7.93085	-7.77895
1785	-7.97719	-7.23236	-8.62934	-7.93085	-7.88064
1786	-7.76149	-7.23236	-8.62934	-7.93085	-8.03231
1787	-7.95562	-7.23236	-8.62934	-7.93085	-8.19118
1788	-7.71116	-7.23236	-8.62934	-7.93085	-8.42776
1789	-8.4733	-7.23236	-8.62934	-7.93085	-8.64004
1790	-7.94124	-7.23236	-8.62934	-7.93085	-8.69208
1791	-9.35048	-7.23236	-8.62934	-7.93085	-8.78555
1792	-8.03471	-7.23236	-8.62934	-7.93085	-8.85129
1793	-7.53141	-7.23236	-8.62934	-7.93085	-8.81055
1794	-8.86875	-7.23236	-8.62934	-7.93085	-8.78863
1795	-9.61651	-7.23236	-8.62934	-7.93085	-8.77596
1796	-9.54461	-7.23236	-8.62934	-7.93085	-8.87799
1797	-10.163	-7.23236	-8.62934	-7.93085	-8.94407
1798	-9.68841	-7.23236	-8.62934	-7.93085	-9.0509
1799	-10.7022	-7.23236	-8.62934	-7.93085	-9.08308
1800	-9.66684	-7.23236	-8.62934	-7.93085	-9.13615
1801	-9.56618	-7.23236	-8.62934	-7.93085	-9.12691
1802	-8.81123	-7.23236	-8.62934	-7.93085	-9.2262
1803	-8.99817	-7.23236	-8.62934	-7.93085	-9.29878
1804	-8.30074	-7.23236	-8.62934	-7.93085	-9.3587
1805	-7.8981	-7.23236	-8.62934	-7.93085	-9.34945
1806	-7.71116	-7.23236	-8.62934	-7.93085	-9.30666
1807	-9.90411	-7.23236	-8.62934	-7.93085	-9.23544
1808	-9.34329	-7.23236	-8.62934	-7.93085	-9.16868
1809	-9.95444	-7.23236	-8.62934	-7.93085	-9.06802
1810	-9.14916	-7.23236	-8.62934	-7.93085	-9.09541
1811	-9.05569	-7.23236	-8.62934	-7.93085	-9.07555
1812	-9.15635	-7.23236	-8.62934	-7.93085	-9.10397
1813	-10.1198	-7.23236	-8.62934	-7.93085	-9.12211
1814	-9.05569	-7.23236	-8.62934	-7.93085	-9.19709
1815	-10.127	-7.23236	-8.62934	-7.93085	-9.22757
1816	-9.42238	-7.23236	-8.62934	-7.93085	-9.28166
1817	-8.64586	-7.23236	-8.62934	-7.93085	-9.20908
1818	-8.66743	-7.23236	-8.62934	-7.93085	-9.16354
1819	-8.28636	-7.23236	-8.62934	-7.93085	-9.08582
1820	-8.58834	-7.23236	-8.62934	-7.93085	-9.0307
1821	-10.242	-7.23236	-8.62934	-7.93085	-8.98756
1822	-9.14916	-7.23236	-8.62934	-7.93085	-8.95743
1823	-9.408	-7.23236	-8.62934	-7.93085	-8.88792
1824	-9.37924	-7.23236	-8.62934	-7.93085	-8.84513
1825	-9.87535	-7.23236	-8.62934	-7.93085	-8.78007
1826	-8.53801	-7.23236	-8.62934	-7.93085	-8.752
1827	-8.84718	-7.23236	-8.62934	-7.93085	-8.75576
1828	-8.37983	-7.23236	-8.62934	-7.93085	-8.77631
1829	-8.38702	-7.23236	-8.62934	-7.93085	-8.83691
1830	-8.32231	-7.23236	-8.62934	-7.93085	-8.93072
1831	-7.99157	-7.23236	-8.62934	-7.93085	-8.91121
1832	-8.14975	-7.23236	-8.62934	-7.93085	-8.97626
1833	-8.52363	-7.23236	-8.62934	-7.93085	-9.02077
1834	-8.66024	-7.23236	-8.62934	-7.93085	-9.05706
1835	-8.15694	-7.23236	-8.62934	-7.93085	-9.01323
1836	-8.7609	-7.23236	-8.62934	-7.93085	-9.04371
1837	-8.8328	-7.23236	-8.62934	-7.93085	-9.00947
1838	-8.72495	-7.23236	-8.62934	-7.93085	-8.99851
1839	-9.09883	-7.23236	-8.62934	-7.93085	-9.04782
1840	-9.55899	-7.23236	-8.62934	-7.93085	-9.10431
1841	-10.5584	-7.23236	-8.62934	-7.93085	-9.15738
1842	-9.83221	-7.23236	-8.62934	-7.93085	-9.12554
1843	-10.5153	-7.23236	-8.62934	-7.93085	-9.06254
1844	-10.3427	-7.23236	-8.62934	-7.93085	-8.99098
1845	-10.1414	-7.23236	-8.62934	-7.93085	-9.04405
1846	-8.95503	-7.23236	-8.62934	-7.93085	-9.05192
1847	-9.17792	-7.23236	-8.62934	-7.93085	-9.00776
1848	-8.12818	-7.23236	-8.62934	-7.93085	-9.01289
1849	-8.14975	-7.23236	-8.62934	-7.93085	-9.03172
1850	-9.42238	-7.23236	-8.62934	-7.93085	-8.98276
1851	-9.50866	-7.23236	-8.62934	-7.93085	-8.82938
1852	-9.10602	-7.23236	-8.62934	-7.93085	-8.72016
1853	-7.48108	-7.23236	-8.62934	-7.93085	-8.53801
1854	-7.20067	-7.23236	-8.62934	-7.93085	-8.44454
1855	-7.15753	-7.23236	-8.62934	-7.93085	-8.35175
1856	-9.27139	-7.23236	-8.62934	-7.93085	-8.33258
1857	-8.92627	-7.23236	-8.62934	-7.93085	-8.32094
1858	-7.90529	-7.23236	-8.62934	-7.93085	-8.39421
1859	-8.8328	-7.23236	-8.62934	-7.93085	-8.4507
1860	-9.49428	-7.23236	-8.62934	-7.93085	-8.44933
1861	-8.53082	-7.23236	-8.62934	-7.93085	-8.42229
1862	-7.33728	-7.23236	-8.62934	-7.93085	-8.42742
1863	-7.5386	-7.23236	-8.62934	-7.93085	-8.50583
1864	-6.69018	-7.23236	-8.62934	-7.93085	-8.62361
1865	-8.37983	-7.23236	-8.62934	-7.93085	-8.76569
1866	-8.19289	-7.23236	-8.62934	-7.93085	-8.74926
1867	-8.55239	-7.23236	-8.62934	-7.93085	-8.75953
1868	-8.93346	-7.23236	-8.62934	-7.93085	-8.87252
1869	-9.66684	-7.23236	-8.62934	-7.93085	-8.92593
1870	-9.3361	-7.23236	-8.62934	-7.93085	-8.91668
1871	-9.39362	-7.23236	-8.62934	-7.93085	-8.98584
1872	-8.94065	-7.23236	-8.62934	-7.93085	-9.14745
1873	-9.21387	-7.23236	-8.62934	-7.93085	-9.24503
1874	-9.12759	-7.23236	-8.62934	-7.93085	-9.43471
1875	-9.67403	-7.23236	-8.62934	-7.93085	-9.53057
1876	-10.1414	-7.23236	-8.62934	-7.93085	-9.60555
1877	-8.92627	-7.23236	-8.62934	-7.93085	-9.57885
1878	-9.14197	-7.23236	-8.62934	-7.93085	-9.54872
1879	-10.278	-7.23236	-8.62934	-7.93085	-9.45354
1880	-9.95444	-7.23236	-8.62934	-7.93085	-9.35459
1881	-9.30015	-7.23236	-8.62934	-7.93085	-9.34706
1882	-9.9832	-7.23236	-8.62934	-7.93085	-9.32377
1883	-10.731	-7.23236	-8.62934	-7.93085	-9.2755
1884	-9.58775	-7.23236	-8.62934	-7.93085	-9.2642
1885	-10.6734	-7.23236	-8.62934	-7.93085	-9.24537
1886	-10.393	-7.23236	-8.62934	-7.93085	-9.14163
1887	-9.7675	-7.23236	-8.62934	-7.93085	-9.181
1888	-7.99157	-7.23236	-8.62934	-7.93085	-9.20531
1889	-8.30074	-7.23236	-8.62934	-7.93085	-9.15498
1890	-7.66802	-7.23236	-8.62934	-7.93085	-9.0687
1891	-7.25819	-7.23236	-8.62934	-7.93085	-9.06836
1892	-9.23544	-7.23236	-8.62934	-7.93085	-8.99714
1893	-8.45173	-7.23236	-8.62934	-7.93085	-8.93449
1894	-8.20008	-7.23236	-8.62934	-7.93085	-8.92832
1895	-8.89032	-7.23236	-8.62934	-7.93085	-8.83622
1896	-9.27858	-7.23236	-8.62934	-7.93085	-8.78144
1897	-7.96281	-7.23236	-8.62934	-7.93085	-8.72255
1898	-9.75312	-7.23236	-8.62934	-7.93085	-8.76775
1899	-9.65246	-7.23236	-8.62934	-7.93085	-8.78007
1900	-9.22106	-7.23236	-8.62934	-7.93085	-8.83177
1901	-8.14256	-7.23236	-8.62934	-7.93085	-8.88964
1902	-9.29296	-7.23236	-8.62934	-7.93085	-8.93997
1903	-8.48768	-7.23236	-8.62934	-7.93085	-8.97181
1904	-9.41519	-7.23236	-8.62934	-7.93085	-9.01323
1905	-9.45833	-7.23236	-8.62934	-7.93085	-9.02214
1906	-8.73933	-7.23236	-8.62934	-7.93085	-8.98858
1907	-9.24263	-7.23236	-8.62934	-7.93085	-8.97968
1908	-8.53082	-7.23236	-8.62934	-7.93085	-8.98653
1909	-8.94065	-7.23236	-8.62934	-7.93085	-8.91497
1910	-8.55958	-7.23236	-8.62934	-7.93085	-8.90333
1911	-8.75371	-7.23236	-8.62934	-7.93085	-8.91463
1912	-8.4733	-7.23236	-8.62934	-7.93085	-8.8441
1913	-10.2924	-7.23236	-8.62934	-7.93085	-8.86738
1914	-9.1204	-7.23236	-8.62934	-7.93085	-8.86293
1915	-9.07007	-7.23236	-8.62934	-7.93085	-8.76638
1916	-9.07726	-7.23236	-8.62934	-7.93085	-8.71194
1917	-8.57396	-7.23236	-8.62934	-7.93085	-8.66264
1918	-7.77587	-7.23236	-8.62934	-7.93085	-8.63833
1919	-9.89692	-7.23236	-8.62934	-7.93085	-8.57499
1920	-8.14975	-7.23236	-8.62934	-7.93085	-8.54554
1921	-8.9766	-7.23236	-8.62934	-7.93085	-8.54075
1922	-8.37983	-7.23236	-8.62934	-7.93085	-8.55855
1923	-7.81182	-7.23236	-8.62934	-7.93085	-8.48323
1924	-8.9766	-7.23236	-8.62934	-7.93085	-8.44283
1925	-9.32172	-7.23236	-8.62934	-7.93085	-8.39729
1926	-7.43075	-7.23236	-8.62934	-7.93085	-8.3699
1927	-7.59612	-7.23236	-8.62934	-7.93085	-8.33669
1928	-8.20727	-7.23236	-8.62934	-7.93085	-8.28088
1929	-8.02033	-7.23236	-8.62934	-7.93085	-8.14085
1930	-7.6105	-7.23236	-8.62934	-7.93085	-8.16447
1931	-7.94124	-7.23236	-8.62934	-7.93085	-8.08264
1932	-8.65305	-7.23236	-8.62934	-7.93085	-8.06484
1933	-8.84718	-7.23236	-8.62934	-7.93085	-8.03676
1934	-8.71057	-7.23236	-8.62934	-7.93085	-7.91522
1935	-8.27198	-7.23236	-8.62934	-7.93085	-7.79504
1936	-8.1138	-7.23236	-8.62934	-7.93085	-7.72212
1937	-8.50206	-7.23236	-8.62934	-7.93085	-7.57763
1938	-7.87653	-7.23236	-8.62934	-7.93085	-7.58653
1939	-6.6039	-7.23236	-8.62934	-7.93085	-7.51258
1940	-6.95621	-7.23236	-8.62934	-7.93085	-7.46362
1941	-8.64586	-7.23236	-8.62934	-7.93085	-7.41363
1942	-7.25819	-7.23236	-8.62934	-7.93085	-7.3366
1943	-8.00595	-7.23236	-8.62934	-7.93085	-7.21026
1944	-7.22224	-7.23236	-8.62934	-7.93085	-7.13425
1945	-6.42415	-7.23236	-8.62934	-7.93085	-7.05105
1946	-6.79803	-7.23236	-8.62934	-7.93085	-6.95758
1947	-5.89928	-7.23236	-8.62934	-7.93085	-6.92334
1948	-4.56194	-7.23236	-8.62934	-7.93085	-6.85418
1949	-8.39421	-7.23236	-8.62934	-7.93085	-6.86377
1950	-6.46729	-7.23236	-8.62934	-7.93085	-6.87883
1951	-6.58233	-7.23236	-8.62934	-7.93085	-6.69566
1952	-6.8915	-7.23236	-8.62934	-7.93085	-6.60869
1953	-7.0353	-7.23236	-8.62934	-7.93085	-6.58712
1954	-6.19407	-7.23236	-8.62934	-7.93085	-6.62479
1955	-7.11439	-7.23236	-8.62934	-7.93085	-6.65115
1956	-6.52481	-7.23236	-8.62934	-7.93085	-6.6936
1957	-6.15093	-7.23236	-8.62934	-7.93085	-6.75557
1958	-7.78306	-7.23236	-8.62934	-7.93085	-6.86582
1959	-6.42415	-7.23236	-8.62934	-7.93085	-6.78297
1960	-6.80522	-7.23236	-8.62934	-7.93085	-6.72955
1961	-7.27257	-7.23236	-8.62934	-7.93085	-6.68573
1962	-4.79921	-7.23236	-8.62934	-7.93085	-6.70901
1963	-5.43193	-7.23236	-8.62934	-7.93085	-6.60185
1964	-7.55298	-7.23236	-8.62934	-7.93085	-6.63608
1965	-8.01314	-7.23236	-8.62934	-7.93085	-6.66758
1966	-6.97778	-7.23236	-8.62934	-7.93085	-6.66005
1967	-7.68959	-7.23236	-8.62934	-7.93085	-6.71962
1968	-7.20067	-7.23236	-8.62934	-7.93085	-6.68333
1969	-6.87712	-7.23236	-8.62934	-7.93085	-6.61451
1970	-6.65423	-7.23236	-8.62934	-7.93085	-6.56213
1971	-5.34565	-7.23236	-8.62934	-7.93085	-6.49194
1972	-5.66201	-7.23236	-8.62934	-7.93085	-6.4262
1973	-7.38042	-7.23236	-8.62934	-7.93085	-6.44161
1974	-4.78483	-7.23236	-8.62934	-7.93085	-6.3567
1975	-6.91307	-7.23236	-8.62934	-7.93085	-6.23961
1976	-7.77587	-7.23236	-8.62934	-7.93085	-6.10916
1977	-6.36663	-7.23236	-8.62934	-7.93085	-5.98796
1978	-7.40199	-7.23236	-8.62934	-7.93085	-5.9051
1979	-7.02092	-7.23236	-8.62934	-7.93085	-5.76849
1980	-4.97896	-7.23236	-8.62934	-7.93085	-5.67536
1981	-5.70515	-7.23236	-8.62934	-7.93085	-5.65961
1982	-5.79862	-7.23236	-8.62934	-7.93085	-5.68221
1983	-3.41873	-7.23236	-8.62934	-7.93085	-5.59011
1984	-5.75548	-7.23236	-8.62934	-7.93085	-5.60483
1985	-5.76986	-7.23236	-8.62934	-7.93085	-5.44802
1986	-5.55416	-7.23236	-8.62934	-7.93085	-5.41892
1987	-4.23839	-7.23236	-8.62934	-7.93085	-5.34633
1988	-5.14433	-7.23236	-8.62934	-7.93085	-5.2039
1989	-5.46069	-7.23236	-8.62934	-7.93085	-5.21691
1990	-4.00831	-7.23236	-8.62934	-7.93085	-5.25389
1991	-4.69855	-7.23236	-8.62934	-7.93085	-5.1546
1992	-5.01491	-7.23236	-8.62934	-7.93085	-5.29635
1993	-6.13655	-7.23236	-8.62934	-7.93085	-5.45487
1994	-5.44631	-7.23236	-8.62934	-7.93085	-5.44905
1995	-5.094	-7.23236	-8.62934	-7.93085	-5.49596
1996	-3.62005	-7.23236	-8.62934	-7.93085	-5.55108
1997	-7.16472	-7.23236	-8.62934	-7.93085	-5.47884
1998	-4.84235	-7.23236	-8.62934	-7.93085	-5.41652
1999	-4.41095	-7.23236	-8.62934	-7.93085	-5.40146
2000	-7.29414	-7.23236	-8.62934	-7.93085	-5.51342
2001	-5.75548	-7.23236	-8.62934	-7.93085	-5.50691
2002	-3.62005	-7.23236	-8.62934	-7.93085	-5.48877
2003	-8.77528	-7.23236	-8.62934	-7.93085	-5.46446
2004	-6.7477	-7.23236	-8.62934	-7.93085	-5.92701
2005	-5.63325	-7.23236	-8.62934	-7.93085
2006	-6.75489	-7.23236	-8.62934	-7.93085
2007	-6.71175	-7.23236	-8.62934	-7.93085
2008	-2.7213	-7.23236	-8.62934	-7.93085
2009	-3.83575	-7.23236	-8.62934	-7.93085
2010	-5.14433	-7.23236	-8.62934	-7.93085
2011	-6.35944	-7.23236	-8.62934	-7.93085
2012	-4.56194	-7.23236	-8.62934	-7.93085
2013	-4.63384	-7.23236	-8.62934	-7.93085
2014	-5.62606	-7.23236	-8.62934	-7.93085
	-15.16
	-15.16
